# Supplementary material for: The photophysical properties of cycloparaphenylene-based compounds with figure-eight configurations
Source: Royal Society of Chemistry journal article supplement (doi:10.1039/d0nj02637a), 2020-01-01
Supplement: d0nj02637a1.pdf [file d0nj02637a1.pdf]

## SUPPORTING INFORMATION

### **The photophysical properties of cycloparaphenylene-based compounds with figure-eight configuration**

Yanling Si<sup>a</sup>, and Guochun Yang<sup>b\*</sup>

<sup>a</sup>College of Resource and Environmental Science, Jilin Agricultural University, Changchun 130118, China

<sup>b</sup>Centre for Advanced Optoelectronic Functional Materials Research, Key Laboratory for UV Light-Emitting Materials and Technology of Ministry of Education, Northeast Normal University, Changchun 130024, China.

**Table S1** The main concerned bond length (Å) for compound **1** between experiment and calculation.

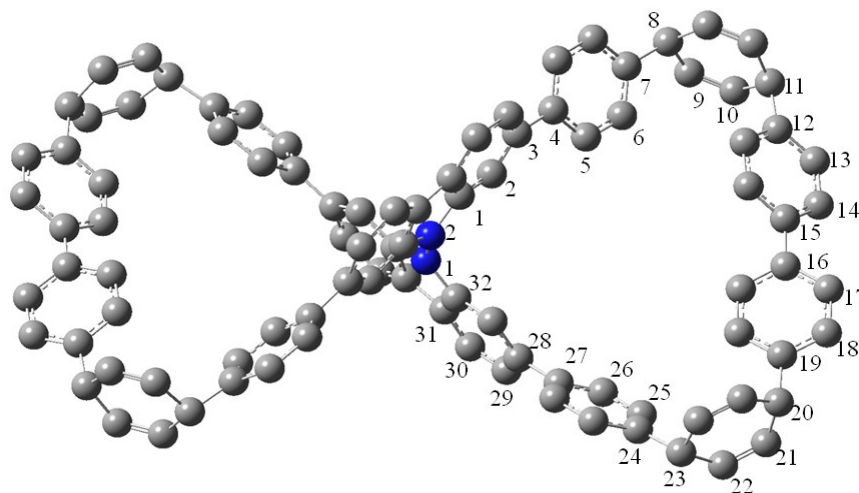

|         | B3LYP | Experiment | Difference |         | B3LYP | Experiment | Difference |
|---------|-------|------------|------------|---------|-------|------------|------------|
| N1-N2   | 1.367 | 1.365      | 0.002      | C16-C17 | 1.403 | 1.384      | 0.019      |
| N2-C1   | 1.400 | 1.397      | 0.003      | C17-C18 | 1.398 | 1.389      | 0.009      |
| C1-C2   | 1.391 | 1.382      | 0.009      | C18-C19 | 1.399 | 1.382      | 0.017      |
| C2-C3   | 1.403 | 1.397      | 0.006      | C19-C20 | 1.537 | 1.522      | 0.015      |
| C3-C4   | 1.485 | 1.493      | -0.008     | C20-C21 | 1.515 | 1.510      | 0.005      |
| C4-C5   | 1.403 | 1.390      | 0.004      | C21-C22 | 1.334 | 1.317      | 0.017      |
| C5-C6   | 1.394 | 1.387      | 0.007      | C22-C23 | 1.511 | 1.500      | 0.011      |
| C6-C7   | 1.399 | 1.388      | 0.011      | C23-C24 | 1.538 | 1.526      | 0.012      |
| C7-C8   | 1.540 | 1.527      | 0.013      | C24-C25 | 1.399 | 1.388      | 0.011      |
| C8-C9   | 1.510 | 1.505      | 0.005      | C25-C26 | 1.394 | 1.375      | 0.019      |
| C9-C10  | 1.335 | 1.320      | 0.015      | C26-C27 | 1.402 | 1.399      | 0.003      |
| C10-C11 | 1.517 | 1.510      | 0.007      | C27-C28 | 1.486 | 1.481      | 0.005      |
| C11-C12 | 1.537 | 1.527      | 0.010      | C28-C29 | 1.415 | 1.409      | 0.006      |
| C12-C13 | 1.400 | 1.382      | 0.018      | C29-C30 | 1.386 | 1.368      | 0.018      |
| C13-C14 | 1.395 | 1.379      | 0.016      | C30-C31 | 1.399 | 1.399      | 0.000      |
| C14-C15 | 1.403 | 1.384      | 0.019      | C31-C32 | 1.416 | 1.405      | 0.011      |
| C15-C16 | 1.484 | 1.484      | 0.000      | C32-N1  | 1.403 | 1.401      | 0.002      |

Note: the difference is equal to calculation value minus experimental value.

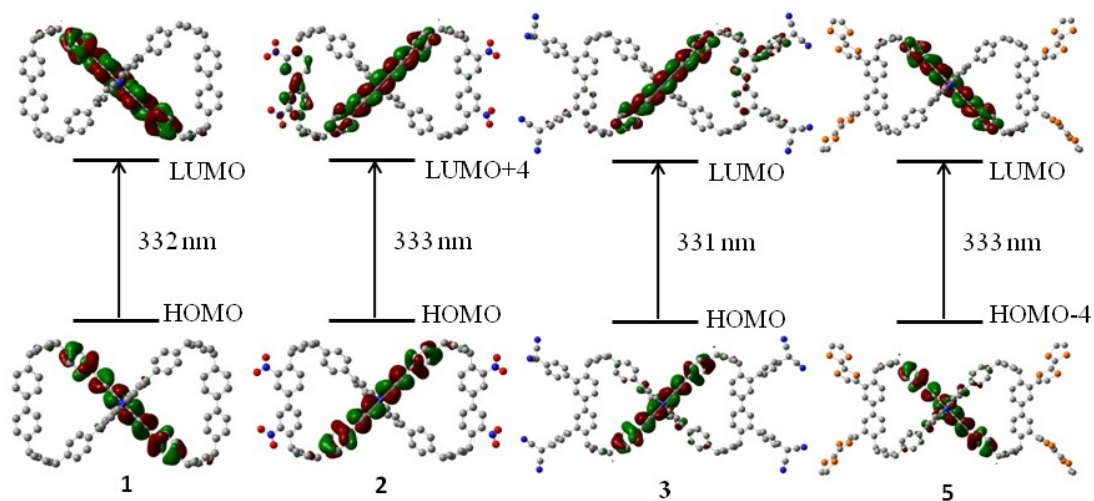

**Figure S1.** Molecular orbital isosurfaces involved in the main electron transitions of compounds 1, 2, 3 and 5.

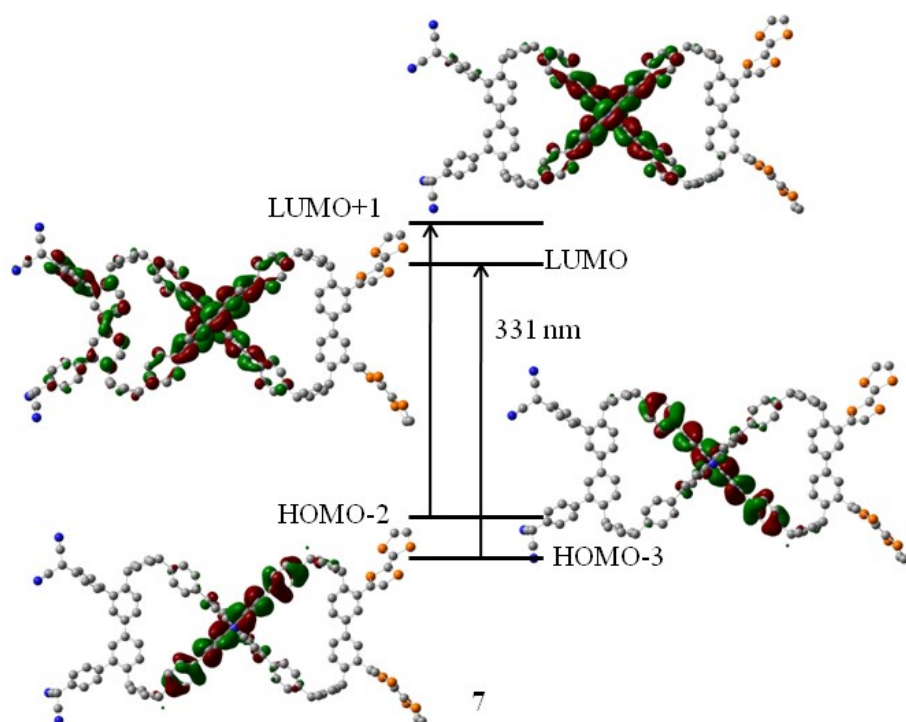

**Figure S2.** Molecular orbital isosurfaces involved in the main electron transitions of compound 7.

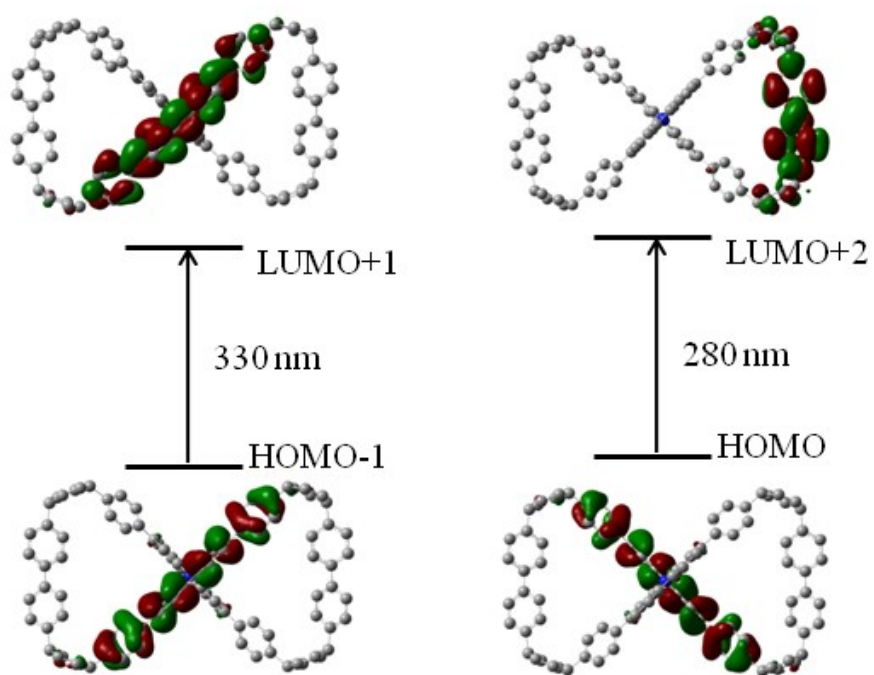

**Figure S3.** Molecular orbitals involved into the main CD transitions of compound **1**.
